# Supplementary material for: Ru/La2S3 nanorods as an electrocatalyst for efficient N2 fixation under ambient conditions
Source: Royal Society of Chemistry journal article supplement (doi:10.1039/d3re00123g), 2023-01-01
Supplement: d3re00123g1.pdf [file d3re00123g1.pdf]

## Supporting Information

### **Ru/La<sub>2</sub>S<sub>3</sub> nanorods as electrocatalyst for efficient N<sub>2</sub> fixation under ambient conditions**

Wang Yingshu<sup>a\*</sup>, Wang Hong<sup>a</sup>, Tang Yixin<sup>a</sup>, Shu Yu<sup>b</sup>, Zhao Suying<sup>a</sup>, Hong Lu<sup>a</sup>, Xu Zhenqi<sup>a</sup>

<sup>a</sup>*Fujian Engineering Research Center of Advanced Manufacturing Technology for Fine Chemicals,*

*College of Chemical Engineering, Fuzhou University, Fuzhou, Fujian, 350108, China*

<sup>b</sup>*College of Materials Science and Engineering, Fuzhou University, Fuzhou, Fujian, 350108,*

*China*

\*Corresponding authors: [ljhwysh@fzu.edu.cn](mailto:ljhwysh@fzu.edu.cn) (Y. Wang)

Table of Contents:

|                                |       |
|--------------------------------|-------|
| I .Experimental Section.....   | S3    |
| II .Supplementary Figures..... | S4-S5 |
| III.Supplementary Table.....   | S6-S7 |
| IV.References.....             | S8    |

## I . Experimental Section

### Process of the Nafion membrane

Step 1: Boiling it in a 3 wt% H<sub>2</sub>O<sub>2</sub> solution at 80 °C for 1 h. Step 2: Washing it in deionized water several times. Step 3: Boiling it for 1 h in 80 °C sulfuric acid. Step 4: Soaking it for 30 min and repeating several times in deionized water.

### Determination of ammonia (NH<sub>3</sub>)

Typically, the indophenol blue method was adopted to quantify the NH<sub>3</sub> in 0.1 M electrolyte. In 0.1 M Na<sub>2</sub>SO<sub>4</sub>, 4 mL the electrolyte was taken from the cathode chamber and was mixed with 50 μL oxidizing solution prepared by NaClO (ρCl = 4–4.9) and 0.75 M NaOH, 500 μL coloring solution (0.4 M C<sub>7</sub>H<sub>5</sub>O<sub>3</sub>Na and 0.32 M NaOH), and 50 μL catalyst solution (1 wt% Na<sub>2</sub>[Fe(CN)<sub>5</sub>NO]<sub>2</sub>H<sub>2</sub>O). After standing in a lightless environment ambient temperatures for 1 h, such solution was analyzed via the UV-Vis spectroscopy at the wavelength of 670 nm. The standard curve is ( $Y = 0.682X + 0.005$   $R^2 = 0.999$ ), which was calibrated using a standardized NH<sub>4</sub>Cl solution with five progressive concentrations.

### Determination of hydrazine (N<sub>2</sub>H<sub>4</sub>)

The hydrazine was identified using the Watt and Chrisp method. Typically, 5 mL electrolyte solution was added with 5 mL hydrazine chromogenic agent prepared by 5.99 g C<sub>9</sub>H<sub>11</sub>NO, 30 mL HCl and 300 mL ethanol. Followed by 20 min complete stir, the absorbance of such solution at the wavelength of 455 nm was measured to quantify the hydrazine yields with a standard curve of hydrazine ( $Y = 2.58529X + 0.12902$ ,  $R^2 = 0.998$ ).

### Calculations of NH<sub>3</sub> formation rate and FE

Rate of NH<sub>3</sub> formation was calculated using the following equation:

$$\text{NH}_3 \text{ yield} = [\text{NH}_3] \times V / (m_{\text{cat}} \times t)$$

FE was calculated according to following equation:

$$\text{FE} (\text{NH}_3) = 3 \times F \times [\text{NH}_3] \times V / (17 \times Q) \times 100\%$$

Where [NH<sub>3</sub>] is the measured NH<sub>4</sub>Cl concentration; V is the volume of the cathode reaction electrolyte; t is the potential applied time; m is the loaded quality of catalyst; F is the Faraday constant; and Q is the quantity of applied electricity.

## II. Supplementary Figures

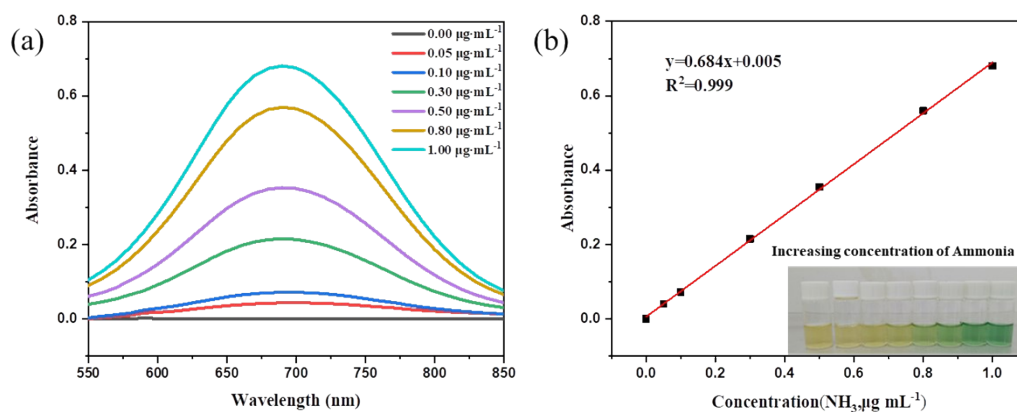

Fig. S1. (a) UV-Vis absorption spectra of indophenol assays performed with different concentrations of  $\text{NH}_3$  in 0.1 M  $\text{Na}_2\text{SO}_4$ . (b) A calibration curve used for estimating the  $\text{NH}_3$  concentration.

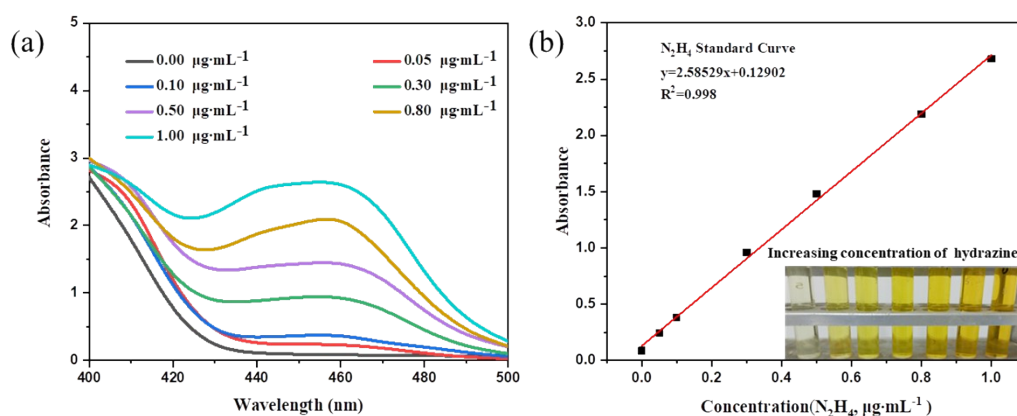

Fig. S2. (a) UV-Vis spectra of various  $\text{N}_2\text{H}_4$  concentrations after adding into chemical indicator by the Watt and Chrisp method. (b) A calibration curve used for the calculation of  $\text{N}_2\text{H}_4$  concentrations.

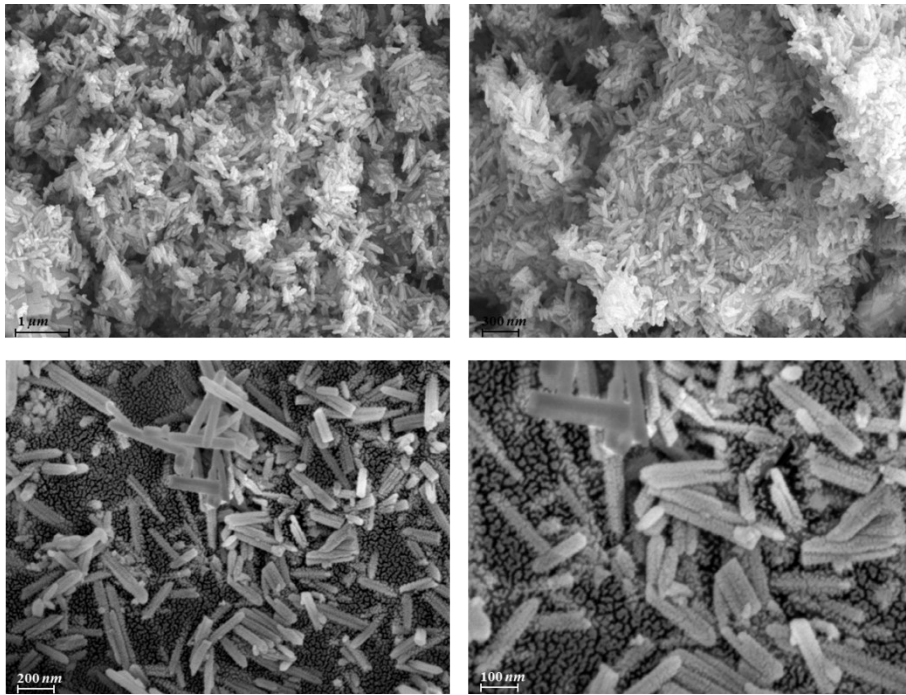

Fig. S3. SEM micrograph of  $\text{La}_2\text{S}_3$

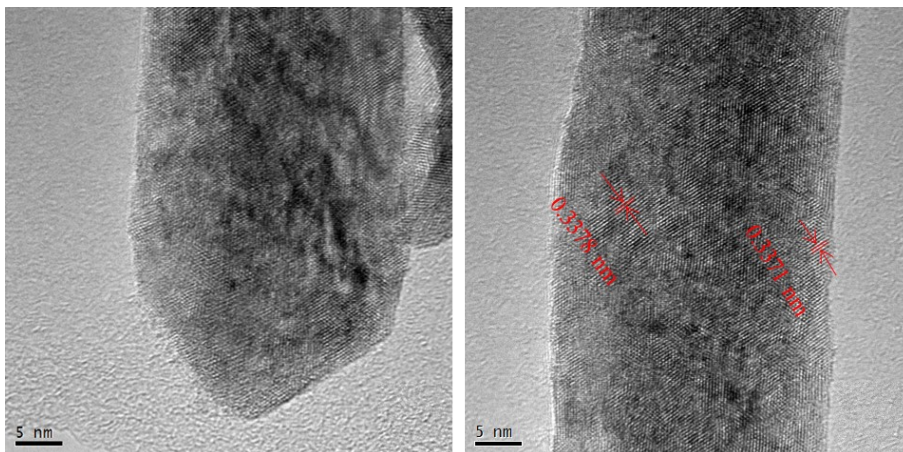

Fig. S4. HRTEM micrograph of  $\text{La}_2\text{S}_3$

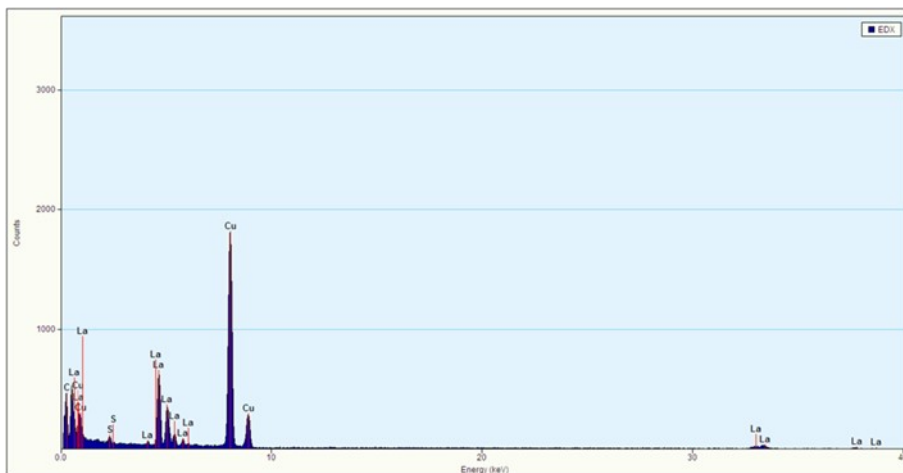

Fig. S5. EDX spectrum of  $\text{La}_2\text{S}_3$

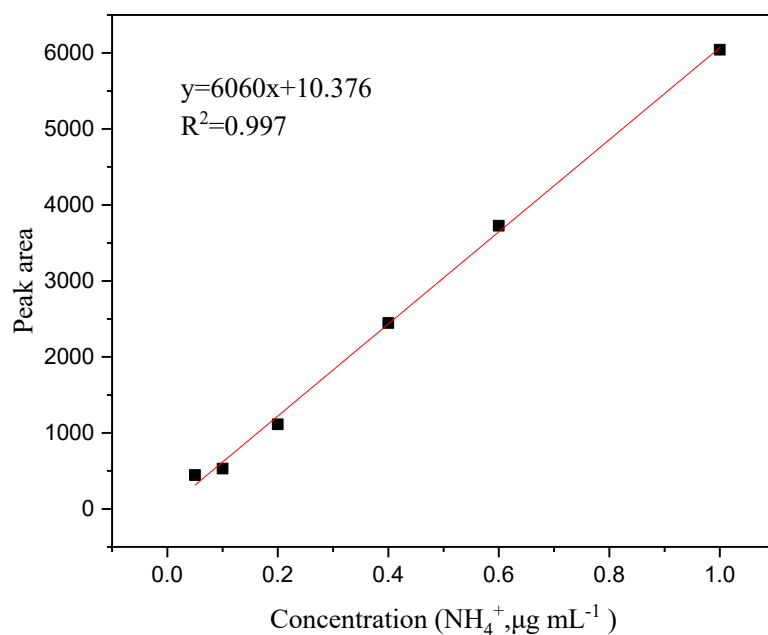

Fig. S6. Calibration curve for ion chromatographic of NH<sub>3</sub> concentration

Table S1. Ion chromatography was compared with salicylic acid method

| Number | Ion chromatography<br>( <sup>NH</sup> <sub>4</sub> <sup>+</sup> , μg/mL) | Absorbance | Indophenol method<br>(μg/mL) | Different<br>(μg/mL) |
|--------|--------------------------------------------------------------------------|------------|------------------------------|----------------------|
| 1      | 0.060                                                                    | 0.034      | 0.061                        | 0.001                |
| 2      | 0.069                                                                    | 0.038      | 0.071                        | 0.002                |
| 3      | 0.112                                                                    | 0.058      | 0.119                        | 0.007                |
| 4      | 0.156                                                                    | 0.071      | 0.152                        | 0.004                |
| 5      | 0.256                                                                    | 0.120      | 0.271                        | 0.015                |

Table S2. Comparison of the NRR electrocatalytic activity of Ru/La<sub>2</sub>S<sub>3</sub> catalyst under ambient conditions with other catalysts.

| Catalyst                                       | Electrolyte                           | NH <sub>3</sub> Yield Rate | FE(%) | Ref  |
|------------------------------------------------|---------------------------------------|----------------------------|-------|------|
| Ag NPs-rGO                                     | 0.1 M HCl                             | 2.8                        | 4.80  | [1]  |
| Au/Ni                                          | 0.05 M H <sub>2</sub> SO <sub>4</sub> | 7.4                        | 67.80 | [2]  |
| a-Au/Cex-RGD                                   | 0.1 M HCl                             | 8.3                        | 10.10 | [3]  |
| Ru NPs                                         | 0.1 M KOH                             | 1.3                        | 5.40  | [4]  |
| Ru@ZrO <sub>2</sub> /NC                        | 0.1 M HCl                             | 3.7                        | 15    | [5]  |
| Au <sub>1</sub> /C <sub>3</sub> N <sub>4</sub> | 0.05 M H <sub>2</sub> SO <sub>4</sub> | 2.0                        | 11.10 | [6]  |
| Ru/MoS <sub>2</sub>                            | 0.01 M HCl                            | 6.98                       | 17.60 | [7]  |
| MoS <sub>2</sub>                               | 0.1M Na <sub>2</sub> SO <sub>4</sub>  | 4.94                       | 1.17  | [8]  |
| DR MoS <sub>2</sub>                            | 0.1M Na <sub>2</sub> SO <sub>4</sub>  | 11.72                      | 8.34  | [9]  |
| MoS <sub>2</sub> -rGO                          | 0.1 M LiClO <sub>4</sub>              | 24.82                      | 4.58  | [10] |
| CoS <sub>2</sub> /NS-G                         | 0.05 M H <sub>2</sub> SO <sub>4</sub> | 10.00                      | 25.90 | [11] |
| FeS <sub>2</sub> -Mo <sub>17.3</sub>           | 0.1 M KOH                             | 25.2                       | 14.41 | [12] |
| Fe <sub>3</sub> S <sub>4</sub>                 | 0.1 M HCl                             | 75.4                       | 6.45  | [13] |

## References:

- [1] Li X, Xie H, Mao J. Ag nanoparticles-reduced graphene oxide hybrid: an efficient electrocatalyst for artificial N<sub>2</sub> fixation to NH<sub>3</sub> at ambient conditions, *Journal of Materials Science*, 55 (2020) 5203-5210.
- [2] Zhang M, Wang Z, Yu H, et al. A mesoporous Au film with surface sulfur modification for efficient ammonia electrosynthesis, *Journal of Materials Chemistry A*, 8 (2020) 20414-20419.
- [3] Li S J, Bao D, Shi M M, et al. Amorphizing of Au Nanoparticles by CeO<sub>x</sub>-RGO Hybrid Support towards Highly Efficient Electrocatalyst for N<sub>2</sub> Reduction under Ambient Conditions, *Adv Mater*, 29 (2017).
- [4] Zhao L, Zhao J, Zhang L, et al. Artificial N<sub>2</sub> fixation to NH<sub>3</sub> by electrocatalytic Ru NPs at low overpotential, *Nanotechnology*, 31 (2020) 29LT01.
- [5] Wang Z Q, Ma Y C, Lin J X. Ruthenium catalyst supported on high-surface-area basic ZrO<sub>2</sub> for ammonia synthesis, *Journal of Molecular Catalysis A: Chemical*, 378 (2013) 307-313.
- [6] Wang X, Zhang Q, Hao W, et al. A novel porous graphitic carbon nitride (g-C<sub>7</sub>N<sub>3</sub>) substrate: prediction of metal-based  $\pi$ -d conjugated nanosheets toward the highly active and selective electrocatalytic nitrogen reduction reaction, *Journal of Materials Chemistry*, 10 (2022) 15036-15050.
- [7] Li J, Chen S, Quan F, et al. Accelerated Dinitrogen Electroreduction to Ammonia via Interfacial Polarization Triggered by Single-Atom Protrusions, *Chem*, 6 (2020) 885-901.
- [8] Song W, Fu L, Ma P, et al. A computational study of strained MoS<sub>2</sub> as catalysts for the electrocatalytic nitrogen reduction reaction, *Journal of Molecular Structure*, 1259 (2022).
- [9] Zhou Y, Yu X, Wang X, et al. MoS<sub>2</sub> nanosheets supported gold nanoparticles for electrochemical nitrogen fixation at various pH value, *Electrochimica Acta*, 317 (2019) 34-41.
- [10] Li X, Ren X, Liu X, et al. A MoS<sub>2</sub> nanosheet-reduced graphene oxide hybrid: an efficient electrocatalyst for electrocatalytic N<sub>2</sub> reduction to NH<sub>3</sub> under ambient conditions, *Journal of Materials Chemistry*, 7 (2019) 2524-2528.
- [11] Chen P, Zhang N, Wang S, et al. Interfacial engineering of cobalt sulfide/graphene hybrids for highly efficient ammonia electrosynthesis, *Proc Natl Acad Sci U S A*, 116 (2019) 6635-6640.
- [12] Yang M, Jin Z, Wang C, et al. Fe Foam-Supported FeS<sub>2</sub>-MoS<sub>2</sub> Electrocatalyst for N<sub>2</sub> Reduction under Ambient Conditions, *ACS Appl Mater Interfaces*, 13 (2021) 55040-55050.
- [13] Chen X, Yin H, Yang X, et al. Co-Doped Fe<sub>3</sub>S<sub>4</sub> Nanoflowers for Boosting Electrocatalytic Nitrogen Fixation to Ammonia under Mild Conditions, *Inorg Chem*, (2022).
